# Supplementary material for: Chronic Resveratrol Treatment Inhibits MRC5 Fibroblast SASP-Related Protumoral Effects on Melanoma Cells
Source: Oxford University Press journal article supplement (doi:10.1093/gerona/glw336), 2017-01-20
Supplement: glw336_suppl_Supplementary_table_Menicacci_et_al.docx [file glw336_suppl_Supplementary_table_Menicacci_et_al.docx]

Supplementary table 1. Primer sequences used for Real Time PCR experiments

| Gene | Forward primer | Reverse Primer |
| --- | --- | --- |
| IL-1α | 5'-AGTAGCAACCAACGGGAAGG-3' | 5'-TGGTTGGTCTTCATCTTGGG-3' |
| IL-1β | 5'-AAATACCTGTGGCCTTGGGC-3' | 5'-TTTGGGATCTACACTCTCCAGCT-3' |
| IL-6 | 5'-GTAGCCGCCCCACACAGA-3' | 5'- CATGTCTCCTTTCTCAGGGCTG-3' |
| IL-8 | 5'-ATAAAGACATACTCCAAACCTTTCCAC-3' | 5'-AAGCTTTACAATAATTTCTGTGTTGGC-3' |
| IL-6 R | 5′-CATTGCCATTGTTCTGAGGTTC-3′ | 5′-AGTAGTCTGTATTGCTGATGTC-3′ |
| MMP-2 | 5'-CAA CCC AGA TGT GGC CAA CT-3' | 5'-GGTCCAGATCAGGTGTGTAGCC-3' |
| MMP-3 | 5′- CTCCAACCGTGAGGAAAATC -3′ | 5′- CATGGAATTTCTCTTCTCATCAAA -3′ |
| MMP-9 | 5′-GAACCAATCTCACCGACAGG-3′ | 5′-GCCACCCGAGTGTAACCATA-3’ |
| uPA | 5′-CACGCAAGGGGAGATGAA-3′ | 5’-ACAGCATTTTGGTGGTGACTT-3′ |
| uPAR | 5′-GCCCAATCCTGGAGCTTGA-3′ | 5′-TCCCCTTGCAGCTGTAACACT-3′ |
| VIM | 5′-TGTCCAAATCGATGTGGATGTTTC-3′ | 5′-TTGTACCATTCTTCTGCCTCCTG-3′ |
| TGFβ | 5'-CCCAGCATCTGCAAAGCTC-3' | 5'-GTCAATGTACAGCTGCCGCA-3' |
| TGFβ-R2 | 5′-CAACCACCAGGGCATCCA-3′ | 5′-TCGTGGTCCCAGCACTCA-3′ |
| CXCR4 | 5'-GCCTTATCCTGCCTGGTATTGTC-3′ | 5'-GCGAAGAAAGCCAGGATGAGGAT-3' |
| IGF-1R | 5′-GCACCATCTTCAAGGGCAATTTG-3′ | 5′-AGGAAGGACAAGGAGACCAAGG-3′ |
| SDF-1 | 5′-GTGTCACTGGCGACACGTAG-3′ | 5′-TCCCATCCCACAGAGAGAAG-3′ |
| N-cad | 5′-GGTGGAGGAGAAGAAGACCAG-3′ | 5′-GGCATCAGGCTCCACAGT-3′ |
| GAPDH | 5′-CAATGACCCCTTCATTGACCTC-3′ | 5′-AGCATCGCCCCACTTGATT-3′ |

*Notes:* IL = interleukin; MMP = matrix metallo-proteinase; uPA = urokinase plasminogen activator; uPAR = urokinase plasminogen activator receptor; VIM = vimentin; TGFβ = transforming growth factor beta; TGFβ-R2 = transforming growth factor beta receptor 2; CXCR4 = C-X-C chemokine receptor type 4; IGF-1R = insulin-like growth factor 1; SDF-1 = stromal cell-derived factor 1; N-cad = N-cadherin; GAPDH = glyceraldehyde 3-phosphate dehydrogenase
